# Supplementary material
Source: PubMed Central journal article supplement (PMC4902594)
Supplement: supp_pp.16.00057_PP2016-00057R2_Supplemental_Table_2.pdf [file supp_pp.16.00057_PP2016-00057R2_Supplemental_Table_2.pdf]

**Table S2. Enriched GO functional categories of interacting proteins within the ABA signaling network.**

| GO                                                                           | Term                                                | Category | FDR       | P value   | No. of test genes in category | Percent in test | No. of reference genes in category | Percent in reference | Fold |
|------------------------------------------------------------------------------|-----------------------------------------------------|----------|-----------|-----------|-------------------------------|-----------------|------------------------------------|----------------------|------|
| <b>GO functional analysis of proteins by compared to those in AraPPINet.</b> |                                                     |          |           |           |                               |                 |                                    |                      |      |
| GO:0051716                                                                   | cellular response to stimulus                       | P        | 1.17E-210 | 2.27E-212 | 667                           | 37.28           | 826                                | 7.67                 | 4.86 |
| GO:0050794                                                                   | regulation of cellular process                      | P        | 1.17E-210 | 2.27E-212 | 667                           | 37.28           | 826                                | 7.67                 | 4.86 |
| GO:0007165                                                                   | signal transduction                                 | P        | 1.17E-210 | 2.27E-212 | 667                           | 37.28           | 826                                | 7.67                 | 4.86 |
| GO:0023052                                                                   | signaling                                           | P        | 6.16E-207 | 1.79E-208 | 678                           | 37.90           | 879                                | 8.16                 | 4.64 |
| GO:0044700                                                                   | single organism signaling                           | P        | 6.16E-207 | 1.79E-208 | 678                           | 37.90           | 879                                | 8.16                 | 4.64 |
| GO:0050789                                                                   | regulation of biological process                    | P        | 9.34E-197 | 3.17E-198 | 736                           | 41.14           | 1126                               | 10.46                | 3.93 |
| GO:0050896                                                                   | response to stimulus                                | P        | 4.04E-187 | 1.76E-188 | 1247                          | 69.70           | 3542                               | 32.90                | 2.12 |
| GO:0007154                                                                   | cell communication                                  | P        | 1.18E-185 | 5.71E-187 | 718                           | 40.13           | 1129                               | 10.49                | 3.83 |
| GO:0065007                                                                   | biological regulation                               | P        | 2.50E-181 | 1.34E-182 | 768                           | 42.93           | 1338                               | 12.43                | 3.45 |
| GO:0009719                                                                   | response to endogenous stimulus                     | P        | 1.79E-174 | 1.04E-175 | 579                           | 32.36           | 736                                | 6.84                 | 4.73 |
| GO:0044763                                                                   | single-organism cellular process                    | P        | 2.20E-137 | 1.39E-138 | 1100                          | 61.49           | 3254                               | 30.22                | 2.03 |
| GO:0044260                                                                   | cellular macromolecule metabolic process            | P        | 8.68E-113 | 6.32E-114 | 1058                          | 59.14           | 3319                               | 30.83                | 1.92 |
| GO:0044699                                                                   | single-organism process                             | P        | 9.71E-111 | 7.54E-112 | 1352                          | 75.57           | 5116                               | 47.52                | 1.59 |
| GO:0043170                                                                   | macromolecule metabolic process                     | P        | 3.90E-107 | 3.21E-108 | 1168                          | 65.29           | 4017                               | 37.31                | 1.75 |
| GO:0006950                                                                   | response to stress                                  | P        | 1.65E-102 | 1.44E-103 | 847                           | 47.34           | 2366                               | 21.97                | 2.15 |
| GO:0009628                                                                   | response to abiotic stimulus                        | P        | 7.15E-93  | 6.59E-94  | 658                           | 36.78           | 1611                               | 14.96                | 2.46 |
| GO:0090304                                                                   | nucleic acid metabolic process                      | P        | 8.27E-87  | 8.03E-88  | 673                           | 37.62           | 1740                               | 16.16                | 2.33 |
| GO:0044271                                                                   | cellular nitrogen compound biosynthetic process     | P        | 2.07E-80  | 2.81E-81  | 572                           | 31.97           | 1375                               | 12.77                | 2.50 |
| GO:0019438                                                                   | aromatic compound biosynthetic process              | P        | 2.07E-80  | 2.81E-81  | 572                           | 31.97           | 1375                               | 12.77                | 2.50 |
| GO:0006350                                                                   | transcription, DNA-templated                        | P        | 2.07E-80  | 2.81E-81  | 572                           | 31.97           | 1375                               | 12.77                | 2.50 |
| GO:0032774                                                                   | RNA biosynthetic process                            | P        | 2.07E-80  | 2.81E-81  | 572                           | 31.97           | 1375                               | 12.77                | 2.50 |
| GO:1901362                                                                   | organic cyclic compound biosynthetic process        | P        | 2.07E-80  | 2.81E-81  | 572                           | 31.97           | 1375                               | 12.77                | 2.50 |
| GO:0016070                                                                   | RNA metabolic process                               | P        | 2.07E-80  | 2.81E-81  | 572                           | 31.97           | 1375                               | 12.77                | 2.50 |
| GO:0034654                                                                   | nucleobase-containing compound biosynthetic process | P        | 2.07E-80  | 2.81E-81  | 572                           | 31.97           | 1375                               | 12.77                | 2.50 |
| GO:0018130                                                                   | heterocycle biosynthetic process                    | P        | 2.07E-80  | 2.81E-81  | 572                           | 31.97           | 1375                               | 12.77                | 2.50 |
| GO:0036211                                                                   | protein modification process                        | P        | 9.48E-74  | 1.52E-74  | 592                           | 33.09           | 1532                               | 14.23                | 2.33 |
| GO:0043412                                                                   | macromolecule modification                          | P        | 9.48E-74  | 1.52E-74  | 592                           | 33.09           | 1532                               | 14.23                | 2.33 |
| GO:0006464                                                                   | cellular protein modification process               | P        | 9.48E-74  | 1.52E-74  | 592                           | 33.09           | 1532                               | 14.23                | 2.33 |
| GO:0044237                                                                   | cellular metabolic process                          | P        | 5.03E-71  | 8.29E-72  | 1243                          | 69.48           | 5044                               | 46.85                | 1.48 |
| GO:0009791                                                                   | post-embryonic development                          | P        | 2.05E-64  | 3.48E-65  | 517                           | 28.90           | 1317                               | 12.23                | 2.36 |
| GO:0032502                                                                   | developmental process                               | P        | 3.60E-63  | 6.30E-64  | 763                           | 42.65           | 2471                               | 22.95                | 1.86 |
| GO:0009987                                                                   | cellular process                                    | P        | 3.68E-63  | 6.61E-64  | 1681                          | 93.96           | 8478                               | 78.74                | 1.19 |
| GO:0007275                                                                   | multicellular organismal development                | P        | 5.34E-63  | 9.86E-64  | 735                           | 41.08           | 2335                               | 21.69                | 1.89 |
| GO:0044707                                                                   | single-multicellular organism process               | P        | 6.05E-63  | 1.15E-63  | 746                           | 41.70           | 2391                               | 22.21                | 1.88 |
| GO:0044767                                                                   | single-organism developmental process               | P        | 2.77E-62  | 5.38E-63  | 739                           | 41.31           | 2366                               | 21.97                | 1.88 |
| GO:0032501                                                                   | multicellular organismal process                    | P        | 7.49E-62  | 1.49E-62  | 749                           | 41.87           | 2421                               | 22.49                | 1.86 |
| GO:0009607                                                                   | response to biotic stimulus                         | P        | 2.51E-55  | 5.12E-56  | 424                           | 23.70           | 1033                               | 9.59                 | 2.47 |
| GO:0010467                                                                   | gene expression                                     | P        | 4.87E-55  | 1.02E-55  | 621                           | 34.71           | 1902                               | 17.67                | 1.97 |
| GO:0071704                                                                   | organic substance metabolic process                 | P        | 2.00E-54  | 4.28E-55  | 1434                          | 80.16           | 6651                               | 61.77                | 1.30 |
| GO:1901576                                                                   | organic substance biosynthetic process              | P        | 6.55E-54  | 1.53E-54  | 593                           | 33.15           | 1788                               | 16.61                | 2.00 |
| GO:0044249                                                                   | cellular biosynthetic process                       | P        | 6.55E-54  | 1.53E-54  | 593                           | 33.15           | 1788                               | 16.61                | 2.00 |
| GO:0009059                                                                   | macromolecule biosynthetic process                  | P        | 6.55E-54  | 1.53E-54  | 593                           | 33.15           | 1788                               | 16.61                | 2.00 |
| GO:0034645                                                                   | cellular macromolecule biosynthetic process         | P        | 6.55E-54  | 1.53E-54  | 593                           | 33.15           | 1788                               | 16.61                | 2.00 |
| GO:0044238                                                                   | primary metabolic process                           | P        | 7.47E-54  | 1.78E-54  | 1431                          | 79.99           | 6642                               | 61.69                | 1.30 |
| GO:0016265                                                                   | death                                               | P        | 1.00E-51  | 2.48E-52  | 191                           | 10.68           | 247                                | 2.29                 | 4.65 |
| GO:0008219                                                                   | cell death                                          | P        | 1.00E-51  | 2.48E-52  | 191                           | 10.68           | 247                                | 2.29                 | 4.65 |
| GO:1901360                                                                   | organic cyclic compound metabolic process           | P        | 7.71E-47  | 2.09E-47  | 791                           | 44.21           | 2892                               | 26.86                | 1.65 |
| GO:0046483                                                                   | heterocycle metabolic process                       | P        | 7.71E-47  | 2.09E-47  | 791                           | 44.21           | 2892                               | 26.86                | 1.65 |
| GO:0006139                                                                   | nucleobase-containing compound metabolic process    | P        | 7.71E-47  | 2.09E-47  | 791                           | 44.21           | 2892                               | 26.86                | 1.65 |
| GO:0006725                                                                   | cellular aromatic compound metabolic process        | P        | 7.71E-47  | 2.09E-47  | 791                           | 44.21           | 2892                               | 26.86                | 1.65 |
| GO:0034641                                                                   | cellular nitrogen compound metabolic process        | P        | 7.71E-47  | 2.09E-47  | 791                           | 44.21           | 2892                               | 26.86                | 1.65 |
| GO:0044267                                                                   | cellular protein metabolic process                  | P        | 8.59E-45  | 2.38E-45  | 603                           | 33.71           | 1977                               | 18.36                | 1.84 |
| GO:0019538                                                                   | protein metabolic process                           | P        | 7.85E-44  | 2.21E-44  | 740                           | 41.36           | 2682                               | 24.91                | 1.66 |
| GO:0009058                                                                   | biosynthetic process                                | P        | 7.85E-42  | 2.25E-42  | 1068                          | 59.70           | 4557                               | 42.32                | 1.41 |
| GO:0008152                                                                   | metabolic process                                   | P        | 3.86E-40  | 1.20E-40  | 1514                          | 84.63           | 7546                               | 70.08                | 1.21 |
| GO:0048856                                                                   | anatomical structure development                    | P        | 9.45E-39  | 3.03E-39  | 509                           | 28.45           | 1627                               | 15.11                | 1.88 |
| GO:0006807                                                                   | nitrogen compound metabolic process                 | P        | 6.85E-37  | 2.23E-37  | 880                           | 49.19           | 3583                               | 33.28                | 1.48 |
| GO:0009605                                                                   | response to external stimulus                       | P        | 1.88E-36  | 6.20E-37  | 274                           | 15.32           | 645                                | 5.99                 | 2.56 |
| GO:0009908                                                                   | flower development                                  | P        | 3.14E-31  | 1.11E-31  | 238                           | 13.30           | 562                                | 5.22                 | 2.55 |
| GO:0090567                                                                   | reproductive shoot system development               | P        | 3.14E-31  | 1.11E-31  | 238                           | 13.30           | 562                                | 5.22                 | 2.55 |
| GO:0048367                                                                   | shoot system development                            | P        | 3.14E-31  | 1.11E-31  | 238                           | 13.30           | 562                                | 5.22                 | 2.55 |
| GO:0061458                                                                   | reproductive system development                     | P        | 4.55E-31  | 1.72E-31  | 238                           | 13.30           | 565                                | 5.25                 | 2.54 |
| GO:0044702                                                                   | single organism reproductive process                | P        | 4.55E-31  | 1.72E-31  | 238                           | 13.30           | 565                                | 5.25                 | 2.54 |
| GO:0048608                                                                   | reproductive structure development                  | P        | 4.55E-31  | 1.72E-31  | 238                           | 13.30           | 565                                | 5.25                 | 2.54 |
| GO:0003006                                                                   | developmental process involved in reproduction      | P        | 4.55E-31  | 1.72E-31  | 238                           | 13.30           | 565                                | 5.25                 | 2.54 |
| GO:0048731                                                                   | system development                                  | P        | 4.55E-31  | 1.72E-31  | 238                           | 13.30           | 565                                | 5.25                 | 2.54 |
| GO:0000003                                                                   | reproduction                                        | P        | 1.56E-29  | 5.98E-30  | 430                           | 24.04           | 1415                               | 13.14                | 1.83 |
| GO:0007049                                                                   | cell cycle                                          | P        | 1.22E-28  | 4.75E-29  | 214                           | 11.96           | 498                                | 4.63                 | 2.59 |
| GO:0009653                                                                   | anatomical structure morphogenesis                  | P        | 2.32E-28  | 9.13E-29  | 364                           | 20.35           | 1132                               | 10.51                | 1.94 |

|            |                                                                 |   |           |           |      |       |      |       |      |
|------------|-----------------------------------------------------------------|---|-----------|-----------|------|-------|------|-------|------|
| GO:0022414 | reproductive process                                            | P | 1.58E-23  | 6.30E-24  | 270  | 15.09 | 793  | 7.37  | 2.05 |
| GO:0016043 | cellular component organization                                 | P | 8.76E-20  | 3.87E-20  | 561  | 31.36 | 2283 | 21.20 | 1.48 |
| GO:0071840 | cellular component organization or biogenesis                   | P | 8.76E-20  | 3.87E-20  | 561  | 31.36 | 2283 | 21.20 | 1.48 |
| GO:0040007 | growth                                                          | P | 2.34E-15  | 1.06E-15  | 197  | 11.01 | 606  | 5.63  | 1.96 |
| GO:0030154 | cell differentiation                                            | P | 2.55E-15  | 1.17E-15  | 226  | 12.63 | 734  | 6.82  | 1.85 |
| GO:0048869 | cellular developmental process                                  | P | 2.55E-15  | 1.17E-15  | 226  | 12.63 | 734  | 6.82  | 1.85 |
| GO:0006259 | DNA metabolic process                                           | P | 9.08E-11  | 4.58E-11  | 160  | 8.94  | 524  | 4.87  | 1.84 |
| GO:0016049 | cell growth                                                     | P | 9.57E-11  | 4.88E-11  | 147  | 8.22  | 467  | 4.34  | 1.89 |
| GO:0009790 | embryo development                                              | P | 1.73E-10  | 8.91E-11  | 127  | 7.10  | 383  | 3.56  | 2.00 |
| GO:0010468 | regulation of gene expression                                   | P | 2.27E-05  | 1.34E-05  | 90   | 5.03  | 317  | 2.94  | 1.71 |
| GO:0019222 | regulation of metabolic process                                 | P | 2.27E-05  | 1.34E-05  | 90   | 5.03  | 317  | 2.94  | 1.71 |
| GO:0040029 | regulation of gene expression, epigenetic                       | P | 2.27E-05  | 1.34E-05  | 90   | 5.03  | 317  | 2.94  | 1.71 |
| GO:0060255 | regulation of macromolecule metabolic process                   | P | 2.27E-05  | 1.34E-05  | 90   | 5.03  | 317  | 2.94  | 1.71 |
| GO:0009838 | abscission                                                      | P | 6.47E-05  | 3.93E-05  | 16   | 0.89  | 23   | 0.21  | 4.19 |
| GO:0009606 | tropism                                                         | P | 7.73E-05  | 4.73E-05  | 40   | 2.24  | 109  | 1.01  | 2.21 |
| GO:0009056 | catabolic process                                               | P | 1.79E-04  | 1.13E-04  | 358  | 20.01 | 1751 | 16.26 | 1.23 |
| GO:0006810 | transport                                                       | P | 2.76E-04  | 1.78E-04  | 459  | 25.66 | 2329 | 21.63 | 1.19 |
| GO:0051234 | establishment of localization                                   | P | 2.76E-04  | 1.78E-04  | 459  | 25.66 | 2329 | 21.63 | 1.19 |
| GO:0051179 | localization                                                    | P | 2.76E-04  | 1.78E-04  | 459  | 25.66 | 2329 | 21.63 | 1.19 |
| GO:0019748 | secondary metabolic process                                     | P | 5.16E-04  | 3.38E-04  | 196  | 10.96 | 895  | 8.31  | 1.32 |
| GO:0009991 | response to extracellular stimulus                              | P | 8.73E-04  | 5.77E-04  | 67   | 3.75  | 248  | 2.30  | 1.63 |
| GO:0006091 | generation of precursor metabolites and energy                  | P | 1.36E-02  | 1.04E-02  | 99   | 5.53  | 449  | 4.17  | 1.33 |
| GO:0007267 | cell-cell signaling                                             | P | 4.60E-02  | 3.55E-02  | 18   | 1.01  | 61   | 0.57  | 1.78 |
| GO:0005515 | protein binding                                                 | F | 0         | 0         | 1123 | 62.77 | 1289 | 11.97 | 5.24 |
| GO:0005488 | binding                                                         | F | 2.30E-191 | 8.93E-193 | 1572 | 87.87 | 5701 | 52.95 | 1.66 |
| GO:0003700 | sequence-specific DNA binding transcription factor activity     | F | 3.62E-78  | 5.28E-79  | 426  | 23.81 | 826  | 7.67  | 3.10 |
| GO:0001071 | nucleic acid binding transcription factor activity              | F | 3.62E-78  | 5.28E-79  | 426  | 23.81 | 826  | 7.67  | 3.10 |
| GO:0003677 | DNA binding                                                     | F | 7.88E-39  | 2.49E-39  | 383  | 21.41 | 1061 | 9.85  | 2.17 |
| GO:0016301 | kinase activity                                                 | F | 6.85E-35  | 2.33E-35  | 297  | 16.60 | 753  | 6.99  | 2.37 |
| GO:0016772 | transferase activity, transferring phosphorus-containing groups | F | 6.85E-35  | 2.33E-35  | 297  | 16.60 | 753  | 6.99  | 2.37 |
| GO:0004871 | signal transducer activity                                      | F | 3.51E-21  | 1.48E-21  | 72   | 4.02  | 86   | 0.80  | 5.04 |
| GO:0060089 | molecular transducer activity                                   | F | 3.51E-21  | 1.48E-21  | 72   | 4.02  | 86   | 0.80  | 5.04 |
| GO:0097159 | organic cyclic compound binding                                 | F | 6.92E-21  | 2.99E-21  | 802  | 44.83 | 3569 | 33.15 | 1.35 |
| GO:1901363 | heterocyclic compound binding                                   | F | 6.92E-21  | 2.99E-21  | 802  | 44.83 | 3569 | 33.15 | 1.35 |
| GO:0003676 | nucleic acid binding                                            | F | 3.21E-13  | 1.51E-13  | 431  | 24.09 | 1791 | 16.63 | 1.45 |
| GO:0030234 | enzyme regulator activity                                       | F | 2.83E-12  | 1.39E-12  | 82   | 4.58  | 181  | 1.68  | 2.73 |
| GO:0030528 | transcription regulator activity                                | F | 1.14E-11  | 5.64E-12  | 37   | 2.07  | 43   | 0.40  | 5.18 |
| GO:0004872 | receptor activity                                               | F | 1.18E-11  | 5.91E-12  | 40   | 2.24  | 51   | 0.47  | 4.72 |
| GO:0005102 | receptor binding                                                | F | 4.68E-05  | 2.81E-05  | 18   | 1.01  | 28   | 0.26  | 3.87 |
| GO:0016740 | transferase activity                                            | F | 3.43E-04  | 2.23E-04  | 363  | 20.29 | 1795 | 16.67 | 1.22 |
| GO:0008289 | lipid binding                                                   | F | 5.99E-03  | 4.19E-03  | 41   | 2.29  | 146  | 1.36  | 1.69 |

**GO functional analysis of proteins by compared to those in Arabidopsis genome**

|            |                                                 |   |           |           |      |       |       |       |      |
|------------|-------------------------------------------------|---|-----------|-----------|------|-------|-------|-------|------|
| GO:0051716 | cellular response to stimulus                   | P | 0         | 0         | 667  | 37.28 | 1227  | 4.66  | 8.00 |
| GO:0050794 | regulation of cellular process                  | P | 0         | 0         | 667  | 37.28 | 1227  | 4.66  | 8.00 |
| GO:0007165 | signal transduction                             | P | 0         | 0         | 667  | 37.28 | 1227  | 4.66  | 8.00 |
| GO:0023052 | signaling                                       | P | 0         | 0         | 678  | 37.90 | 1307  | 4.96  | 7.63 |
| GO:0044700 | single organism signaling                       | P | 0         | 0         | 678  | 37.90 | 1307  | 4.96  | 7.63 |
| GO:0050789 | regulation of biological process                | P | 0         | 0         | 736  | 41.14 | 1619  | 6.15  | 6.69 |
| GO:0050896 | response to stimulus                            | P | 0         | 0         | 1247 | 69.70 | 4926  | 18.71 | 3.73 |
| GO:0044699 | single-organism process                         | P | 0         | 0         | 1352 | 75.57 | 6974  | 26.49 | 2.85 |
| GO:0007154 | cell communication                              | P | 0         | 0         | 718  | 40.13 | 1656  | 6.29  | 6.38 |
| GO:0065007 | biological regulation                           | P | 0         | 0         | 768  | 42.93 | 1876  | 7.13  | 6.02 |
| GO:0044763 | single-organism cellular process                | P | 0         | 0         | 1100 | 61.49 | 4268  | 16.21 | 3.79 |
| GO:0009987 | cellular process                                | P | 0         | 0         | 1681 | 93.96 | 12722 | 48.32 | 1.94 |
| GO:0009719 | response to endogenous stimulus                 | P | 1.76E-300 | 1.28E-301 | 579  | 32.36 | 1034  | 3.93  | 8.24 |
| GO:0043170 | macromolecule metabolic process                 | P | 6.71E-269 | 5.21E-270 | 1168 | 65.29 | 6420  | 24.38 | 2.68 |
| GO:0044238 | primary metabolic process                       | P | 3.95E-263 | 3.26E-264 | 1431 | 79.99 | 10135 | 38.49 | 2.08 |
| GO:0071704 | organic substance metabolic process             | P | 1.79E-262 | 1.57E-263 | 1434 | 80.16 | 10199 | 38.74 | 2.07 |
| GO:0006950 | response to stress                              | P | 3.22E-262 | 2.97E-263 | 847  | 47.34 | 3231  | 12.27 | 3.86 |
| GO:0044260 | cellular macromolecule metabolic process        | P | 2.24E-258 | 2.17E-259 | 1058 | 59.14 | 5341  | 20.29 | 2.92 |
| GO:0044237 | cellular metabolic process                      | P | 1.37E-255 | 1.40E-256 | 1243 | 69.48 | 7592  | 28.84 | 2.41 |
| GO:0008152 | metabolic process                               | P | 7.13E-245 | 7.62E-246 | 1514 | 84.63 | 11932 | 45.32 | 1.87 |
| GO:0009628 | response to abiotic stimulus                    | P | 2.71E-240 | 3.02E-241 | 658  | 36.78 | 1975  | 7.50  | 4.90 |
| GO:0090304 | nucleic acid metabolic process                  | P | 2.47E-207 | 2.87E-208 | 673  | 37.62 | 2435  | 9.25  | 4.07 |
| GO:0032502 | developmental process                           | P | 9.05E-207 | 1.10E-207 | 763  | 42.65 | 3200  | 12.15 | 3.51 |
| GO:0044707 | single-multicellular organism process           | P | 1.50E-202 | 1.89E-203 | 746  | 41.70 | 3107  | 11.80 | 3.53 |
| GO:0032501 | multicellular organismal process                | P | 1.73E-201 | 2.26E-202 | 749  | 41.87 | 3148  | 11.96 | 3.50 |
| GO:0007275 | multicellular organismal development            | P | 1.52E-200 | 2.07E-201 | 735  | 41.08 | 3038  | 11.54 | 3.56 |
| GO:0044767 | single-organism developmental process           | P | 4.90E-200 | 6.90E-201 | 739  | 41.31 | 3080  | 11.70 | 3.53 |
| GO:0009058 | biosynthetic process                            | P | 8.50E-187 | 1.24E-187 | 1068 | 59.70 | 6751  | 25.64 | 2.33 |
| GO:0006807 | nitrogen compound metabolic process             | P | 5.94E-179 | 8.94E-180 | 880  | 49.19 | 4774  | 18.13 | 2.71 |
| GO:0044271 | cellular nitrogen compound biosynthetic process | P | 7.52E-179 | 1.42E-179 | 572  | 31.97 | 1979  | 7.52  | 4.25 |
| GO:0019438 | aromatic compound biosynthetic process          | P | 7.52E-179 | 1.42E-179 | 572  | 31.97 | 1979  | 7.52  | 4.25 |
| GO:0006350 | transcription, DNA-templated                    | P | 7.52E-179 | 1.42E-179 | 572  | 31.97 | 1979  | 7.52  | 4.25 |
| GO:0032774 | RNA biosynthetic process                        | P | 7.52E-179 | 1.42E-179 | 572  | 31.97 | 1979  | 7.52  | 4.25 |
| GO:1901362 | organic cyclic compound biosynthetic process    | P | 7.52E-179 | 1.42E-179 | 572  | 31.97 | 1979  | 7.52  | 4.25 |
| GO:0016070 | RNA metabolic process                           | P | 7.52E-179 | 1.42E-179 | 572  | 31.97 | 1979  | 7.52  | 4.25 |

|            |                                                             |   |           |           |      |       |      |       |       |
|------------|-------------------------------------------------------------|---|-----------|-----------|------|-------|------|-------|-------|
| GO:0034654 | nucleobase-containing compound biosynthetic process         | P | 7.52E-179 | 1.42E-179 | 572  | 31.97 | 1979 | 7.52  | 4.25  |
| GO:0018130 | heterocycle biosynthetic process                            | P | 7.52E-179 | 1.42E-179 | 572  | 31.97 | 1979 | 7.52  | 4.25  |
| GO:1901360 | organic cyclic compound metabolic process                   | P | 1.14E-175 | 2.43E-176 | 791  | 44.21 | 3929 | 14.92 | 2.96  |
| GO:0046483 | heterocycle metabolic process                               | P | 1.14E-175 | 2.43E-176 | 791  | 44.21 | 3929 | 14.92 | 2.96  |
| GO:0006139 | nucleobase-containing compound metabolic process            | P | 1.14E-175 | 2.43E-176 | 791  | 44.21 | 3929 | 14.92 | 2.96  |
| GO:0006725 | cellular aromatic compound metabolic process                | P | 1.14E-175 | 2.43E-176 | 791  | 44.21 | 3929 | 14.92 | 2.96  |
| GO:0034641 | cellular nitrogen compound metabolic process                | P | 1.14E-175 | 2.43E-176 | 791  | 44.21 | 3929 | 14.92 | 2.96  |
| GO:0036211 | protein modification process                                | P | 4.53E-175 | 1.03E-175 | 592  | 33.09 | 2178 | 8.27  | 4.00  |
| GO:0043412 | macromolecule modification                                  | P | 4.53E-175 | 1.03E-175 | 592  | 33.09 | 2178 | 8.27  | 4.00  |
| GO:0006464 | cellular protein modification process                       | P | 4.53E-175 | 1.03E-175 | 592  | 33.09 | 2178 | 8.27  | 4.00  |
| GO:0009791 | post-embryonic development                                  | P | 5.34E-170 | 1.24E-170 | 517  | 28.90 | 1671 | 6.35  | 4.55  |
| GO:0009607 | response to biotic stimulus                                 | P | 5.76E-148 | 1.45E-148 | 424  | 23.70 | 1250 | 4.75  | 4.99  |
| GO:0048856 | anatomical structure development                            | P | 8.48E-131 | 2.18E-131 | 509  | 28.45 | 2081 | 7.90  | 3.60  |
| GO:0019538 | protein metabolic process                                   | P | 2.71E-123 | 7.10E-124 | 740  | 41.36 | 4382 | 16.64 | 2.49  |
| GO:0010467 | gene expression                                             | P | 4.29E-117 | 1.15E-117 | 621  | 34.71 | 3304 | 12.55 | 2.77  |
| GO:0016043 | cellular component organization                             | P | 5.64E-116 | 1.56E-116 | 561  | 31.36 | 2760 | 10.48 | 2.99  |
| GO:0071840 | cellular component organization or biogenesis               | P | 5.64E-116 | 1.56E-116 | 561  | 31.36 | 2760 | 10.48 | 2.99  |
| GO:1901576 | organic substance biosynthetic process                      | P | 1.57E-112 | 4.65E-113 | 593  | 33.15 | 3121 | 11.85 | 2.80  |
| GO:0044249 | cellular biosynthetic process                               | P | 1.57E-112 | 4.65E-113 | 593  | 33.15 | 3121 | 11.85 | 2.80  |
| GO:0009059 | macromolecule biosynthetic process                          | P | 1.57E-112 | 4.65E-113 | 593  | 33.15 | 3121 | 11.85 | 2.80  |
| GO:0034645 | cellular macromolecule biosynthetic process                 | P | 1.57E-112 | 4.65E-113 | 593  | 33.15 | 3121 | 11.85 | 2.80  |
| GO:0044267 | cellular protein metabolic process                          | P | 1.76E-105 | 5.31E-106 | 603  | 33.71 | 3354 | 12.74 | 2.65  |
| GO:0000003 | reproduction                                                | P | 3.28E-102 | 1.02E-102 | 430  | 24.04 | 1842 | 7.00  | 3.44  |
| GO:0016265 | death                                                       | P | 5.74E-98  | 1.87E-98  | 191  | 10.68 | 309  | 1.17  | 9.10  |
| GO:0008219 | cell death                                                  | P | 5.74E-98  | 1.87E-98  | 191  | 10.68 | 309  | 1.17  | 9.10  |
| GO:0009653 | anatomical structure morphogenesis                          | P | 1.73E-94  | 5.70E-95  | 364  | 20.35 | 1425 | 5.41  | 3.76  |
| GO:0009605 | response to external stimulus                               | P | 3.69E-92  | 1.25E-92  | 274  | 15.32 | 812  | 3.08  | 4.97  |
| GO:0009908 | flower development                                          | P | 3.94E-79  | 1.59E-79  | 238  | 13.30 | 710  | 2.70  | 4.93  |
| GO:0090567 | reproductive shoot system development                       | P | 3.94E-79  | 1.59E-79  | 238  | 13.30 | 710  | 2.70  | 4.93  |
| GO:0048367 | shoot system development                                    | P | 3.94E-79  | 1.59E-79  | 238  | 13.30 | 710  | 2.70  | 4.93  |
| GO:0061458 | reproductive system development                             | P | 7.41E-79  | 3.16E-79  | 238  | 13.30 | 713  | 2.71  | 4.91  |
| GO:0044702 | single organism reproductive process                        | P | 7.41E-79  | 3.16E-79  | 238  | 13.30 | 713  | 2.71  | 4.91  |
| GO:0048608 | reproductive structure development                          | P | 7.41E-79  | 3.16E-79  | 238  | 13.30 | 713  | 2.71  | 4.91  |
| GO:0003006 | developmental process involved in reproduction              | P | 7.41E-79  | 3.16E-79  | 238  | 13.30 | 713  | 2.71  | 4.91  |
| GO:0048731 | system development                                          | P | 7.41E-79  | 3.16E-79  | 238  | 13.30 | 713  | 2.71  | 4.91  |
| GO:0007049 | cell cycle                                                  | P | 3.59E-76  | 1.55E-76  | 214  | 11.96 | 588  | 2.23  | 5.36  |
| GO:0022414 | reproductive process                                        | P | 8.60E-71  | 3.76E-71  | 270  | 15.09 | 1029 | 3.91  | 3.86  |
| GO:0030154 | cell differentiation                                        | P | 6.94E-56  | 3.10E-56  | 226  | 12.63 | 901  | 3.42  | 3.69  |
| GO:0048869 | cellular developmental process                              | P | 6.94E-56  | 3.10E-56  | 226  | 12.63 | 901  | 3.42  | 3.69  |
| GO:0006810 | transport                                                   | P | 7.18E-54  | 3.31E-54  | 459  | 25.66 | 3093 | 11.75 | 2.18  |
| GO:0051234 | establishment of localization                               | P | 7.18E-54  | 3.31E-54  | 459  | 25.66 | 3093 | 11.75 | 2.18  |
| GO:0051179 | localization                                                | P | 7.18E-54  | 3.31E-54  | 459  | 25.66 | 3093 | 11.75 | 2.18  |
| GO:0040007 | growth                                                      | P | 4.01E-51  | 1.87E-51  | 197  | 11.01 | 750  | 2.85  | 3.87  |
| GO:0009056 | catabolic process                                           | P | 3.07E-48  | 1.44E-48  | 358  | 20.01 | 2212 | 8.40  | 2.38  |
| GO:0006259 | DNA metabolic process                                       | P | 1.05E-40  | 2.42E-40  | 160  | 8.94  | 628  | 2.39  | 3.75  |
| GO:0016049 | cell growth                                                 | P | 1.48E-37  | 6.97E-38  | 147  | 8.22  | 566  | 2.15  | 3.82  |
| GO:0044710 | single-organism metabolic process                           | P | 1.24E-36  | 6.00E-37  | 387  | 21.63 | 2842 | 10.79 | 2.00  |
| GO:0019748 | secondary metabolic process                                 | P | 1.34E-32  | 7.10E-33  | 196  | 10.96 | 1048 | 3.98  | 2.75  |
| GO:0009790 | embryo development                                          | P | 5.86E-31  | 3.13E-31  | 127  | 7.10  | 511  | 1.94  | 3.66  |
| GO:0005975 | carbohydrate metabolic process                              | P | 3.86E-24  | 2.19E-24  | 267  | 14.92 | 1978 | 7.51  | 1.99  |
| GO:0006629 | lipid metabolic process                                     | P | 1.13E-19  | 6.78E-20  | 213  | 11.91 | 1559 | 5.92  | 2.01  |
| GO:0010468 | regulation of gene expression                               | P | 9.42E-19  | 5.85E-19  | 90   | 5.03  | 417  | 1.58  | 3.18  |
| GO:0019222 | regulation of metabolic process                             | P | 9.42E-19  | 5.85E-19  | 90   | 5.03  | 417  | 1.58  | 3.18  |
| GO:0040029 | regulation of gene expression, epigenetic                   | P | 9.42E-19  | 5.85E-19  | 90   | 5.03  | 417  | 1.58  | 3.18  |
| GO:0060255 | regulation of macromolecule metabolic process               | P | 9.42E-19  | 5.85E-19  | 90   | 5.03  | 417  | 1.58  | 3.18  |
| GO:0044281 | small molecule metabolic process                            | P | 3.06E-18  | 1.99E-18  | 169  | 9.45  | 1153 | 4.38  | 2.16  |
| GO:0043436 | oxoacid metabolic process                                   | P | 3.06E-18  | 1.99E-18  | 169  | 9.45  | 1153 | 4.38  | 2.16  |
| GO:1901564 | organonitrogen compound metabolic process                   | P | 3.06E-18  | 1.99E-18  | 169  | 9.45  | 1153 | 4.38  | 2.16  |
| GO:0006082 | organic acid metabolic process                              | P | 3.06E-18  | 1.99E-18  | 169  | 9.45  | 1153 | 4.38  | 2.16  |
| GO:0006519 | cellular amino acid metabolic process                       | P | 3.06E-18  | 1.99E-18  | 169  | 9.45  | 1153 | 4.38  | 2.16  |
| GO:0019752 | carboxylic acid metabolic process                           | P | 3.06E-18  | 1.99E-18  | 169  | 9.45  | 1153 | 4.38  | 2.16  |
| GO:0006091 | generation of precursor metabolites and energy              | P | 1.21E-16  | 8.21E-17  | 99   | 5.53  | 530  | 2.01  | 2.75  |
| GO:0009606 | tropism                                                     | P | 2.26E-13  | 1.60E-13  | 40   | 2.24  | 126  | 0.48  | 4.67  |
| GO:0009991 | response to extracellular stimulus                          | P | 8.30E-13  | 5.92E-13  | 67   | 3.75  | 338  | 1.28  | 2.92  |
| GO:0015979 | photosynthesis                                              | P | 8.63E-11  | 6.24E-11  | 58   | 3.24  | 302  | 1.15  | 2.83  |
| GO:0065008 | regulation of biological quality                            | P | 8.56E-08  | 6.56E-08  | 48   | 2.68  | 279  | 1.06  | 2.53  |
| GO:0019725 | cellular homeostasis                                        | P | 8.56E-08  | 6.56E-08  | 48   | 2.68  | 279  | 1.06  | 2.53  |
| GO:0042592 | homeostatic process                                         | P | 8.56E-08  | 6.56E-08  | 48   | 2.68  | 279  | 1.06  | 2.53  |
| GO:0009838 | abscission                                                  | P | 1.82E-07  | 1.41E-07  | 16   | 0.89  | 38   | 0.14  | 6.20  |
| GO:0007267 | cell-cell signaling                                         | P | 1.51E-04  | 1.20E-04  | 18   | 1.01  | 88   | 0.33  | 3.01  |
| GO:0044706 | multi-multicellular organism process                        | P | 6.36E-03  | 5.31E-03  | 38   | 2.12  | 338  | 1.28  | 1.65  |
| GO:0044703 | multi-organism reproductive process                         | P | 6.36E-03  | 5.31E-03  | 38   | 2.12  | 338  | 1.28  | 1.65  |
| GO:0051704 | multi-organism process                                      | P | 6.36E-03  | 5.31E-03  | 38   | 2.12  | 338  | 1.28  | 1.65  |
| GO:0009856 | pollination                                                 | P | 6.36E-03  | 5.31E-03  | 38   | 2.12  | 338  | 1.28  | 1.65  |
| GO:0005515 | protein binding                                             | F | 0         | 0         | 1123 | 62.77 | 1574 | 5.98  | 10.50 |
| GO:0005488 | binding                                                     | F | 0         | 0         | 1572 | 87.87 | 9375 | 35.61 | 2.47  |
| GO:0003700 | sequence-specific DNA binding transcription factor activity | F | 1.02E-148 | 2.53E-149 | 426  | 23.81 | 1256 | 4.77  | 4.99  |
| GO:0001071 | nucleic acid binding transcription factor activity          | F | 1.02E-148 | 2.53E-149 | 426  | 23.81 | 1256 | 4.77  | 4.99  |

|            |                                                                 |   |          |          |     |       |      |       |       |
|------------|-----------------------------------------------------------------|---|----------|----------|-----|-------|------|-------|-------|
| GO:0003677 | DNA binding                                                     | F | 3.94E-94 | 1.32E-94 | 383 | 21.41 | 1579 | 6.00  | 3.57  |
| GO:0097159 | organic cyclic compound binding                                 | F | 4.56E-92 | 1.59E-92 | 802 | 44.83 | 5839 | 22.18 | 2.02  |
| GO:1901363 | heterocyclic compound binding                                   | F | 4.56E-92 | 1.59E-92 | 802 | 44.83 | 5839 | 22.18 | 2.02  |
| GO:0016301 | kinase activity                                                 | F | 5.24E-84 | 1.88E-84 | 297 | 16.60 | 1059 | 4.02  | 4.13  |
| GO:0016772 | transferase activity, transferring phosphorus-containing groups | F | 5.24E-84 | 1.88E-84 | 297 | 16.60 | 1059 | 4.02  | 4.13  |
| GO:0003676 | nucleic acid binding                                            | F | 8.01E-36 | 3.93E-36 | 431 | 24.09 | 3357 | 12.75 | 1.89  |
| GO:0016740 | transferase activity                                            | F | 6.11E-35 | 3.10E-35 | 363 | 20.29 | 2640 | 10.03 | 2.02  |
| GO:0004871 | signal transducer activity                                      | F | 6.11E-35 | 3.12E-35 | 72  | 4.02  | 129  | 0.49  | 8.21  |
| GO:0060089 | molecular transducer activity                                   | F | 6.11E-35 | 3.12E-35 | 72  | 4.02  | 129  | 0.49  | 8.21  |
| GO:0036094 | small molecule binding                                          | F | 2.70E-33 | 1.41E-33 | 394 | 22.02 | 3035 | 11.53 | 1.91  |
| GO:1901265 | nucleoside phosphate binding                                    | F | 2.70E-33 | 1.41E-33 | 394 | 22.02 | 3035 | 11.53 | 1.91  |
| GO:0000166 | nucleotide binding                                              | F | 2.70E-33 | 1.41E-33 | 394 | 22.02 | 3035 | 11.53 | 1.91  |
| GO:0030234 | enzyme regulator activity                                       | F | 5.69E-23 | 3.31E-23 | 82  | 4.58  | 294  | 1.12  | 4.10  |
| GO:0004872 | receptor activity                                               | F | 5.04E-22 | 2.96E-22 | 40  | 2.24  | 60   | 0.23  | 9.81  |
| GO:0030528 | transcription regulator activity                                | F | 5.25E-22 | 3.11E-22 | 37  | 2.07  | 48   | 0.18  | 11.34 |
| GO:0003824 | catalytic activity                                              | F | 2.28E-21 | 1.36E-21 | 741 | 41.42 | 7993 | 30.36 | 1.36  |
| GO:0008289 | lipid binding                                                   | F | 2.02E-07 | 1.57E-07 | 41  | 2.29  | 225  | 0.85  | 2.68  |
| GO:0005102 | receptor binding                                                | F | 2.60E-07 | 2.04E-07 | 18  | 1.01  | 51   | 0.19  | 5.19  |
| GO:0016787 | hydrolase activity                                              | F | 2.80E-02 | 2.35E-02 | 226 | 12.63 | 2865 | 10.88 | 1.16  |
