# Supplementary material
Source: PubMed Central journal article supplement (PMC4902594)
Supplement: supp_pp.16.00057_PP2016-00057R2_Supplemental_Tables_1_4_7.pdf [file supp_pp.16.00057_PP2016-00057R2_Supplemental_Tables_1_4_7.pdf]

1 **Table S1. Features of protein-protein pairs in Arabidopsis.**

| <b>Features</b>                 | <b>Protein pairs</b> | <b>Coverage</b> |
|---------------------------------|----------------------|-----------------|
| Structural similarity           | 39,439,520           | 11.48%          |
| Structural distance             | 39,439,520           | 11.48%          |
| Preserved interface size        | 31,625,234           | 9.21%           |
| Fraction of preserved interface | 31,625,234           | 9.21%           |
| Biological process ontology     | 210,586,502          | 61.32%          |
| Molecular function ontology     | 211,428,752          | 61.57%          |
| Cellular component ontology     | 39,867,985           | 11.61%          |
| Gene coexpression               | 204,353,436          | 59.51%          |
| Phylogenetic profile            | 343,416,528          | 100%            |
| Interolog                       | 679,718              | 0.20%           |
| Rosetta stone                   | 979,649              | 0.29%           |

2 Note: Coverage denotes the number of protein pairs with an available given feature  
3 (structural similarity, structural distance, preserved interface size, fraction of the  
4 preserved interface, biological process ontology, molecular function ontology, cellular  
5 component ontology, gene coexpression, phylogenetic profile, interolog and Rosetta  
6 stone) was divided by the total number of possible interactions (343,416,528).

7  
8  
9  
10  
11  
12  
13  
14  
15  
16  
17  
18  
19  
20  
21  
22  
23  
24  
25

26 **Table S4. The Predicted PPIs were Screened out with Yeast Two-hybrid.**

| <b>Protein 1</b> | <b>Protein 2</b> | <b>Two-hybrid test</b> |
|------------------|------------------|------------------------|
| PYL1             | AT5G19280        | Negative               |
| PYL1             | AT5G13530        | Negative               |
| PYL1             | AT4G27800        | Negative               |
| PYL1             | AT4G17615        | Negative               |
| PYL1             | AT4G09570        | Negative               |
| PYL1             | AT3G26090        | Negative               |
| PYL1             | AT3G16857        | Positive               |
| PYL1             | AT1G48270        | Negative               |
| ABI5             | AT5G17490        | Negative               |
| ABI5             | AT5G10140        | Negative               |
| ABI5             | AT5G10120        | Negative               |
| ABI5             | AT5G06960        | Positive               |
| ABI5             | AT4G35050        | Negative               |
| ABI5             | AT4G32980        | Negative               |
| ABI5             | AT4G24210        | Negative               |
| ABI5             | AT4G12570        | Negative               |
| ABI5             | AT4G02590        | Negative               |
| ABI5             | AT3G57530        | Negative               |
| ABI5             | AT3G22840        | Positive               |
| ABI5             | AT3G03450        | Negative               |
| ABI5             | AT2G32950        | Negative               |
| ABI5             | AT2G24260        | Negative               |
| ABI5             | AT2G22540        | Negative               |
| ABI5             | AT2G01760        | Negative               |
| ABI5             | AT2G01570        | Negative               |
| ABI5             | AT1G67030        | Negative               |
| ABI5             | AT1G61290        | Negative               |
| ABI5             | AT1G13260        | Positive               |
| ABI5             | AT1G12610        | Positive               |

27

28

29

30

31

32

33

34

35 **Table S5. Presence of PPIs in Arabidopsis from various databases.**

| <b>Database</b> | <b>BioGRID</b> | <b>IntAct</b> | <b>DIP</b> | <b>MINT</b> | <b>BIND</b> | <b>Overall</b> |
|-----------------|----------------|---------------|------------|-------------|-------------|----------------|
| <b>BioGRID</b>  | 13,813         | 7,267         | 97         | 65          | 802         | 13,813         |
| <b>IntAct</b>   |                | 10,729        | 78         | 39          | 736         | 10,729         |
| <b>DIP</b>      |                |               | 249        | 6           | 7           | 249            |
| <b>MINT</b>     |                |               |            | 130         | 9           | 130            |
| <b>BIND</b>     |                |               |            |             | 990         | 990            |
| <b>Overall</b>  |                |               |            |             |             | 17,569         |

36

37 **Table S6. The gold standard PPI data from various databases.**

| <b>Database</b> | <b>Number of Interactions (small-scale dataset)</b> | <b>Number of Interactions (high-throughput dataset with more than one supporting publication)</b> | <b>Overall</b> |
|-----------------|-----------------------------------------------------|---------------------------------------------------------------------------------------------------|----------------|
| <b>BioGRID</b>  | 3,523                                               | 175                                                                                               | 3,639          |
| <b>IntAct</b>   | 2,560                                               | 180                                                                                               | 2,678          |
| <b>DIP</b>      | 224                                                 | 0                                                                                                 | 224            |
| <b>MINT</b>     | 116                                                 | 0                                                                                                 | 116            |
| <b>BIND</b>     | 530                                                 | 19                                                                                                | 538            |
| <b>Overall</b>  | 4,952                                               | 190                                                                                               | 5,080          |

38

39

40 **Table S7. Availability of PPIs in six model organisms from various databases.**

| <b>Organism</b>        | <b>BioGRID</b> | <b>IntAct</b> | <b>DIP</b> | <b>MINT</b> | <b>BIND</b> |
|------------------------|----------------|---------------|------------|-------------|-------------|
| <i>C. elegans</i>      | 8,157          | 11,643        | 4,056      | 7,373       | 5,418       |
| <i>D. melanogaster</i> | 45,804         | 29,155        | 22,986     | 23,443      | 23,381      |
| <i>H. sapiens</i>      | 174,516        | 68,202        | 2,995      | 26,607      | 12,842      |
| <i>M. musculus</i>     | 10,093         | 10,223        | 699        | 2,858       | 3,208       |
| <i>S. cerevisiae</i>   | 318,572        | 91,690        | 22,367     | 48,427      | 11,348      |
| <i>E. coli</i>         | 0              | 17,035        | 12,688     | 4,926       | 70          |

41

42
